# Supplementary material for: Management of Ascites Following Deceased Donor Liver Transplantation: A Case Series
Source: PubMed Central journal article supplement — Transplant Direct. 2022 Jul 19;8(8):e1350. doi: 10.1097/TXD.0000000000001350 (PMC9298478; doi:10.1097/txd.0000000000001350), 2022-07-19
Supplement: txd-8-e1350-s001.pdf [file txd-8-e1350-s001.pdf]

Figure S1

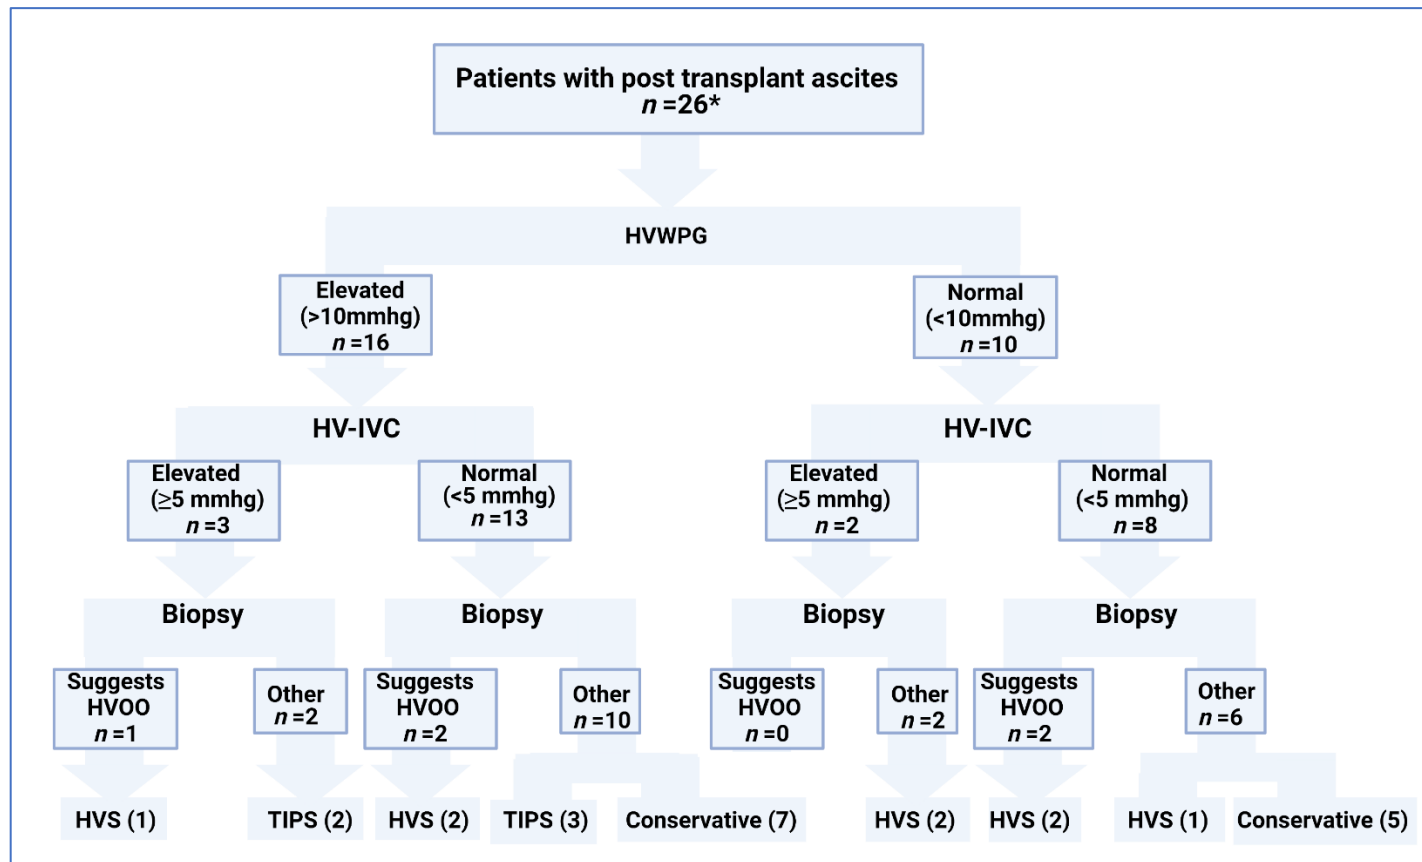

\*Patients that had more than one endovascular intervention were excluded from this figure

**SDC 1 Legend:** Flow diagram demonstrating the series based on HVWPG and HV-IVC pressure measurements, followed by biopsy results. HVOO = Hepatic venous outflow obstruction, HVS = Hepatic venous stent, HVWPG = Hepatic vein wedge pressure gradient, HV-IVC = Hepatic vein – Inferior vena cava, TIPS = Transjugular intrahepatic portosystemic shunt
